# Supplementary material for: Global pharmaceutical regulation: the challenge of integration for developing states
Source: PubMed Central journal article supplement (PMC5175325; doi:10.1186/s12992-016-0208-2), 2016-12-20

### Countries Used in Study and Country Codes

| Country                 | Code | Country                      | Code |
|-------------------------|------|------------------------------|------|
| Afghanistan             | AFG  | Malta                        | MLT  |
| Azerbaijan              | AZE  | Mauritania                   | MRT  |
| Bahrain                 | BHR  | Mauritius                    | MUS  |
| Barbados                | BRB  | Montenegro                   | MNE  |
| Bolivia                 | BOL  | Morocco                      | MAR  |
| Botswana                | BWA  | Mozambique                   | MOZ  |
| Burkina Faso            | BFA  | Namibia                      | NAM  |
| Burundi                 | BDI  | Niger                        | NER  |
| Cameroon                | CMR  | Nigeria                      | NGA  |
| Central Africa Republic | CAR  | Oman                         | OMN  |
| Chad                    | TCD  | Pakistan                     | PAK  |
| Comoros                 | COM  | Palestine                    | PAL  |
| Cote D'Ivoire           | CIV  | Panama                       | PAN  |
| Croatia                 | HRV  | Peru                         | PER  |
| Dominica                | DMA  | Philippines                  | PHL  |
| Egypt                   | EGY  | Qatar                        | QAT  |
| El Salvador             | SLV  | Republic of Moldova          | MDA  |
| Eritrea                 | ERI  | Dominican Republic           | DOM  |
| Estonia                 | EST  | Saint Kitts and Nevis        | KNA  |
| Ethiopia                | ETH  | St. Lucia                    | LCA  |
| Gabon                   | GAB  | St. Vincent & the Grenadines | VCT  |
| Gambia                  | GMB  | Sao Tomé and Príncipe        | STP  |
| Ghana                   | GHA  | Saudi Arabia                 | SAU  |
| Grenada                 | GRD  | Senegal                      | SEN  |
| Guatemala               | GTM  | Seychelles                   | SYC  |
| Guinea                  | GIN  | Sierra Leone                 | SLE  |
| Guinea Bissau           | GNB  | Sri Lanka                    | LKA  |
| Indonesia               | IDN  | Suriname                     | SUR  |
| Iraq                    | IRQ  | Syrian Arab Republic         | SYR  |
| Jordan                  | JOR  | Tanzania                     | TZA  |
| Kenya                   | KEN  | Trinidad and Tobago          | TTO  |
| Kuwait                  | KWT  | Tunisia                      | TUN  |
| Lebanon                 | LBN  | Turkey                       | TUR  |
| Lesotho                 | LSO  | Uganda                       | UGA  |
| Liberia                 | LBR  | Uruguay                      | URY  |
| Madagascar              | MDG  | Uzbekistan                   | UZB  |
| Malawi                  | MWI  | Yemen                        | YEM  |
| Maldives                | MDV  | Zambia                       | ZMB  |
| Mali                    | MLI  | Zimbabwe                     | ZWE  |

Index of Regulation of Pharmaceutical Market by Small and Developing Countries  
(Average  $\varphi$ )

|                         | Regulatory<br>Infrastructure | Private Market<br>Regulation | Public Market<br>Regulation |
|-------------------------|------------------------------|------------------------------|-----------------------------|
| Afghanistan             | -1.14                        | -1.14                        | -0.68                       |
| Azerbaijan              | 0.81                         | 0.81                         | 0.73                        |
| Bahrain                 | 0.15                         | 0.15                         | 1.08                        |
| Barbados                | -0.55                        | -0.55                        | -0.34                       |
| Bolivia                 | 0.48                         | 0.48                         | 1.33                        |
| Botswana                | -0.25                        | -0.25                        | -0.52                       |
| Burkina Faso            | 0.26                         | 0.26                         | 0.31                        |
| Burundi                 | -0.60                        | -0.60                        | 0.90                        |
| Cameroon                | 0.93                         | 0.93                         | 1.23                        |
| Central Africa Republic | -0.65                        | -0.65                        | 0.56                        |
| Chad                    | -0.35                        | -0.35                        | 1.1                         |
| Comoros                 | -0.91                        | -0.91                        | -2.17                       |
| Cote D'Ivoire           | 1.63                         | 1.63                         | 1.12                        |
| Croatia                 | 1.56                         | 1.56                         | 0.67                        |
| Dominica                | -1.71                        | -1.71                        | 0.16                        |
| Egypt                   | 1.49                         | 1.49                         | 1.24                        |
| El Salvador             | -0.19                        | -0.19                        | 0.6                         |
| Eritrea                 | 0.15                         | 0.15                         | -0.05                       |
| Estonia                 | 1.07                         | 1.07                         | -1.51                       |
| Ethiopia                | 0.29                         | 0.29                         | -1.56                       |
| Gabon                   | 0.32                         | 0.32                         | 0.04                        |
| Gambia                  | -0.10                        | -0.10                        | -0.33                       |
| Ghana                   | -0.69                        | -0.69                        | 0.48                        |
| Grenada                 | -0.64                        | -0.64                        | 0.3                         |
| Guatemala               | 1.56                         | 1.56                         | 1.07                        |
| Guinea                  | 0.14                         | 0.14                         | 1.14                        |
| Guinea Bissau           | -0.13                        | -0.13                        | -0.77                       |
| Indonesia               | 0.79                         | 0.79                         | 1.25                        |
| Iraq                    | -0.01                        | -0.01                        | 0.51                        |
| Jordan                  | -0.18                        | -0.18                        | -0.14                       |
| Kenya                   | -0.12                        | -0.12                        | -0.68                       |
| Kuwait                  | -0.94                        | -0.94                        | 0.38                        |
| Lebanon                 | -0.41                        | -0.41                        | -0.71                       |
| Lesotho                 | -1.40                        | -1.40                        | 0.49                        |
| Liberia                 | 0.55                         | 0.55                         | 1.09                        |
| Madagascar              | 0.18                         | 0.18                         | 0.66                        |
| Malawi                  | -0.01                        | -0.01                        | 0.51                        |
| Maldives                | -0.88                        | -0.88                        | -1.72                       |
| Mali                    | 0.58                         | 0.58                         | 0.61                        |
| Malta                   | 0.93                         | 0.93                         | 0.27                        |
| Mauritania              | -0.36                        | -0.36                        | 0.35                        |

Index of Regulation of Pharmaceutical Market by Small and Developing Countries (cont.)

|                                | Regulatory<br>Infrastructure | Private Market<br>Regulation | Public Market<br>Regulation |
|--------------------------------|------------------------------|------------------------------|-----------------------------|
| Mauritius                      | -0.05                        | -0.05                        | 0.28                        |
| Montenegro                     | 1.09                         | 1.09                         | -0.79                       |
| Morocco                        | 0.55                         | 0.55                         | 0.37                        |
| Mozambique                     | -0.64                        | -0.64                        | -0.53                       |
| Namibia                        | 1.32                         | 1.32                         | -0.52                       |
| Niger                          | 0.30                         | 0.30                         | 0.60                        |
| Nigeria                        | 0.18                         | 0.18                         | -0.68                       |
| Oman                           | 0.63                         | 0.63                         | -0.72                       |
| Pakistan                       | -0.40                        | -0.40                        | 0.34                        |
| Palestine                      | -0.55                        | -0.55                        | -0.12                       |
| Panama                         | 0.60                         | 0.60                         | -0.29                       |
| Peru                           | 0.43                         | 0.43                         | -0.64                       |
| Philippines                    | 0.62                         | 0.62                         | -0.52                       |
| Qatar                          | 0.07                         | 0.07                         | 0.67                        |
| Republic of Moldova            | 0.08                         | 0.08                         | -0.74                       |
| Dominican Republic             | 0.54                         | 0.54                         | -0.16                       |
| Saint Kitts and Nevis          | -1.34                        | -1.34                        | -1.79                       |
| St. Lucia                      | -1.39                        | -1.39                        | -0.33                       |
| St. Vincent and the Grenadines | -0.64                        | -0.64                        | 0.84                        |
| São Tomé and Príncipe          | -0.74                        | -0.74                        | -1.88                       |
| Saudi Arabia                   | 1.63                         | 1.63                         | 1.26                        |
| Senegal                        | 1.18                         | 1.18                         | -1.06                       |
| Seychelles                     | -2.01                        | -2.01                        | 0.13                        |
| Sierra Leone                   | 0.26                         | 0.26                         | 0.68                        |
| Sri Lanka                      | -0.54                        | -0.54                        | -0.38                       |
| Suriname                       | -0.70                        | -0.70                        | -0.02                       |
| Syrian Arab Republic           | -0.36                        | -0.36                        | -0.79                       |
| Tanzania                       | 0.76                         | 0.76                         | 1.42                        |
| Trinidad and Tobago            | 0.52                         | 0.52                         | 0.63                        |
| Tunisia                        | 0.49                         | 0.49                         | -1.00                       |
| Turkey                         | 0.09                         | 0.09                         | -1.03                       |
| Uganda                         | 0.33                         | 0.33                         | 0.58                        |
| Uruguay                        | 1.32                         | 1.32                         | -0.71                       |
| Uzbekistan                     | 0.96                         | 0.96                         | 0.07                        |
| Yemen                          | -0.62                        | -0.62                        | 1.11                        |
| Zambia                         | 0.73                         | 0.73                         | 0.39                        |
| Zimbabwe                       | 1.63                         | 1.63                         | 0.72                        |

### Regulatory Infrastructure (estimated values of $\phi$ )

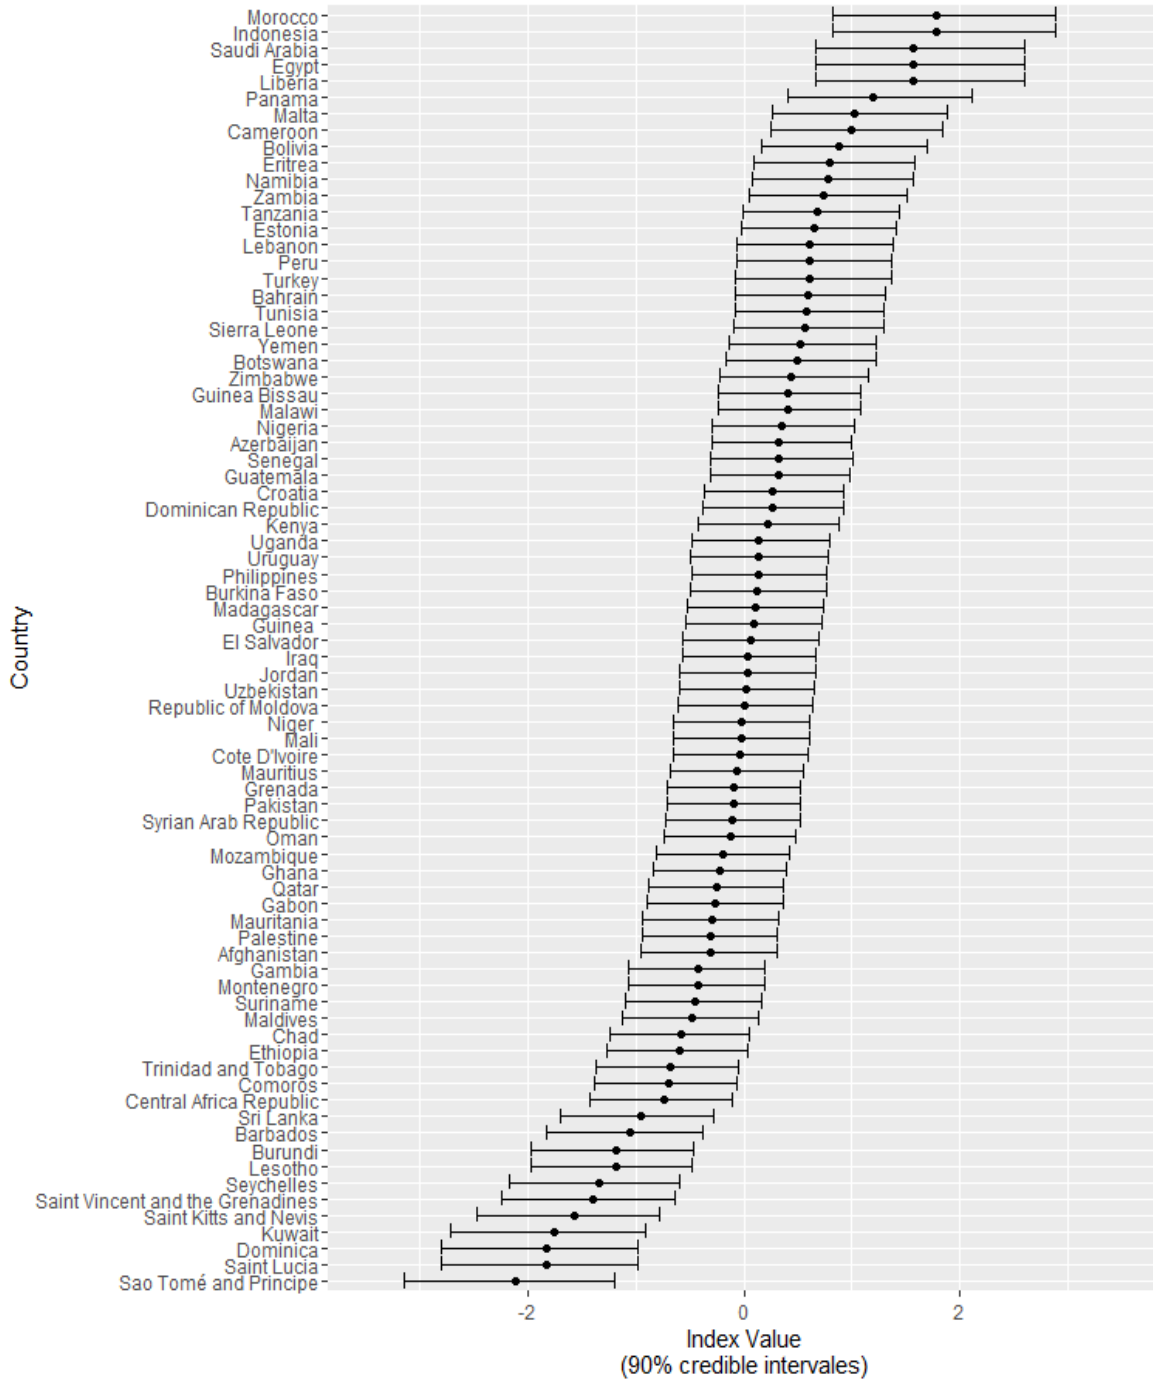

### Regulation of Private Market (estimated values of $\phi$ )

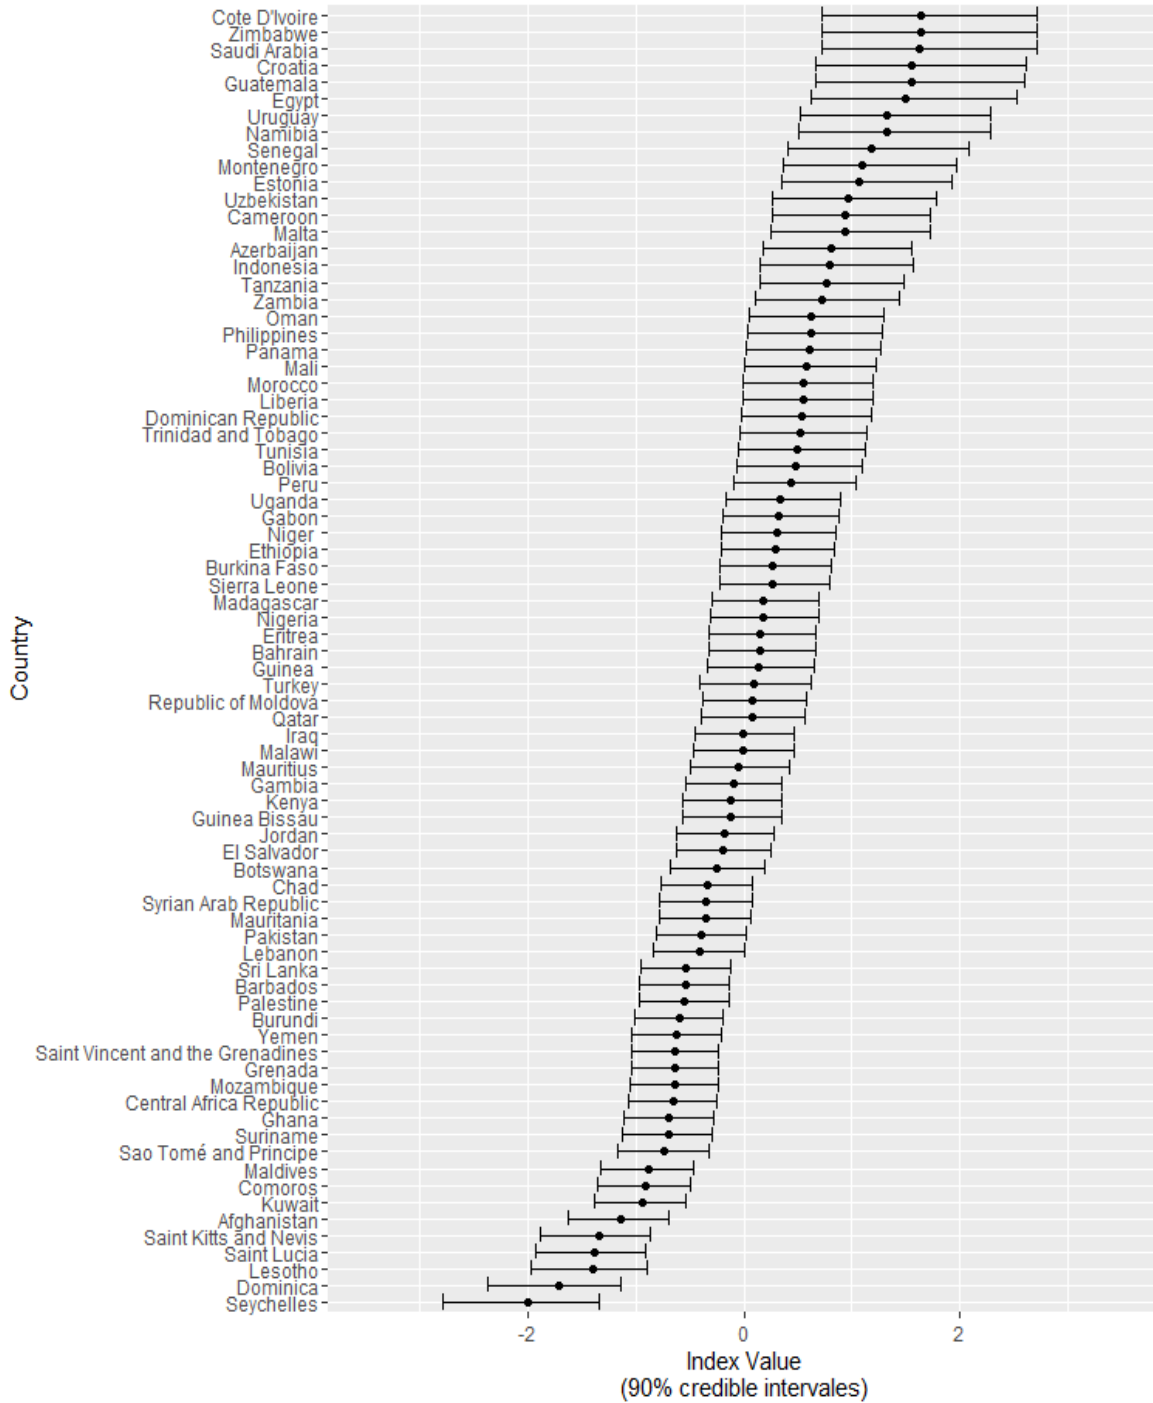

### Public Quality Control (estimated values of $\phi$ )

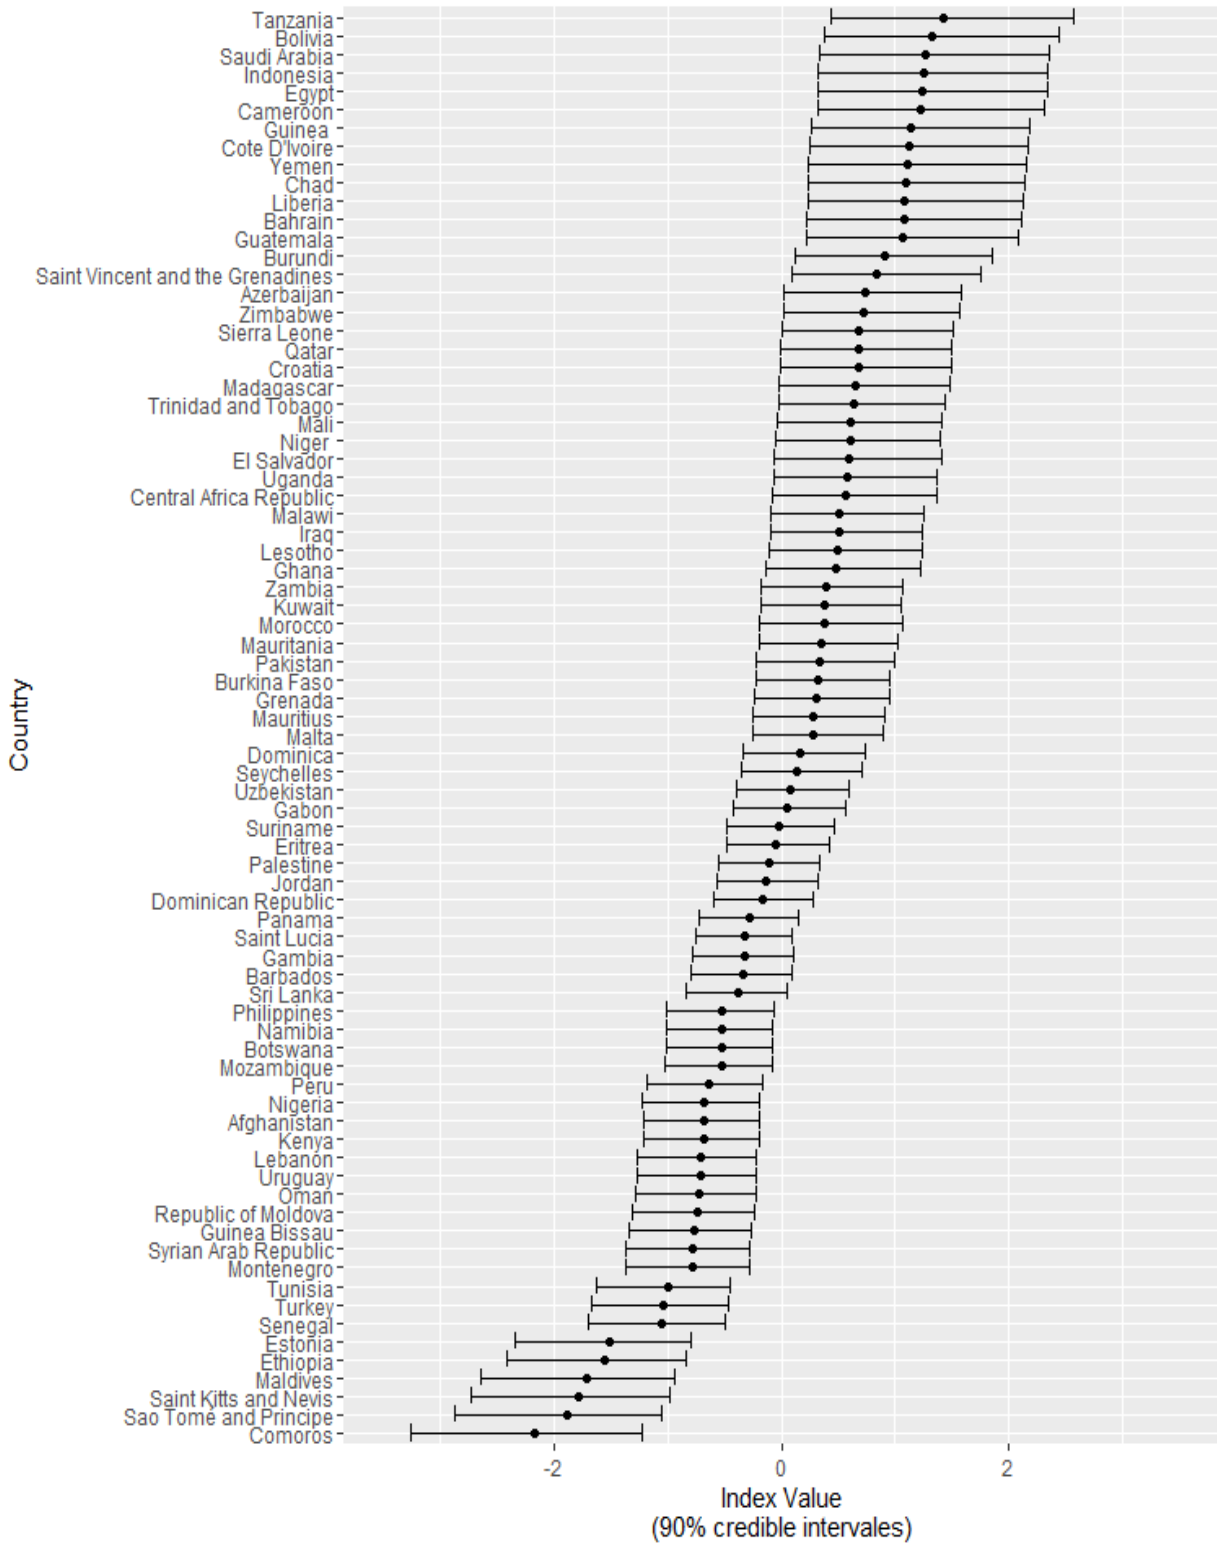

**Figure 2. Relation Between Regulatory Infrastructure and the Regulation of Private Market**

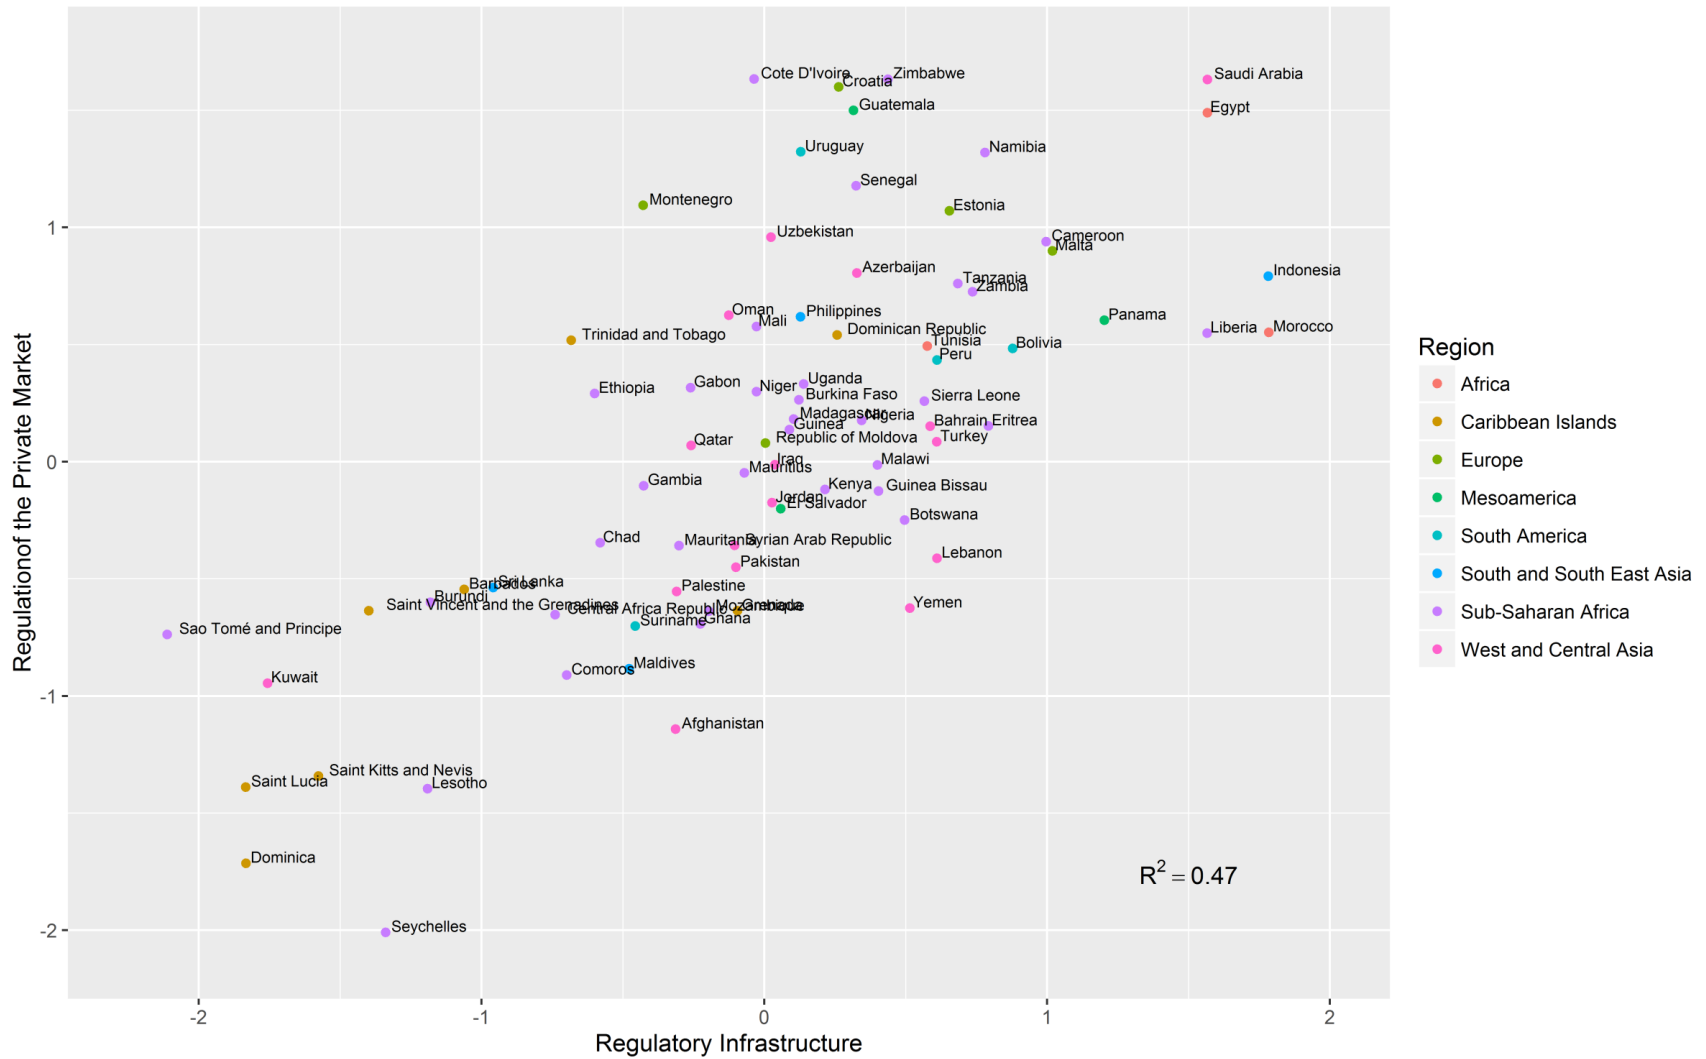

Figure 3. Relation Between Regulatory Infrastructure and the Regulation of the Public Market

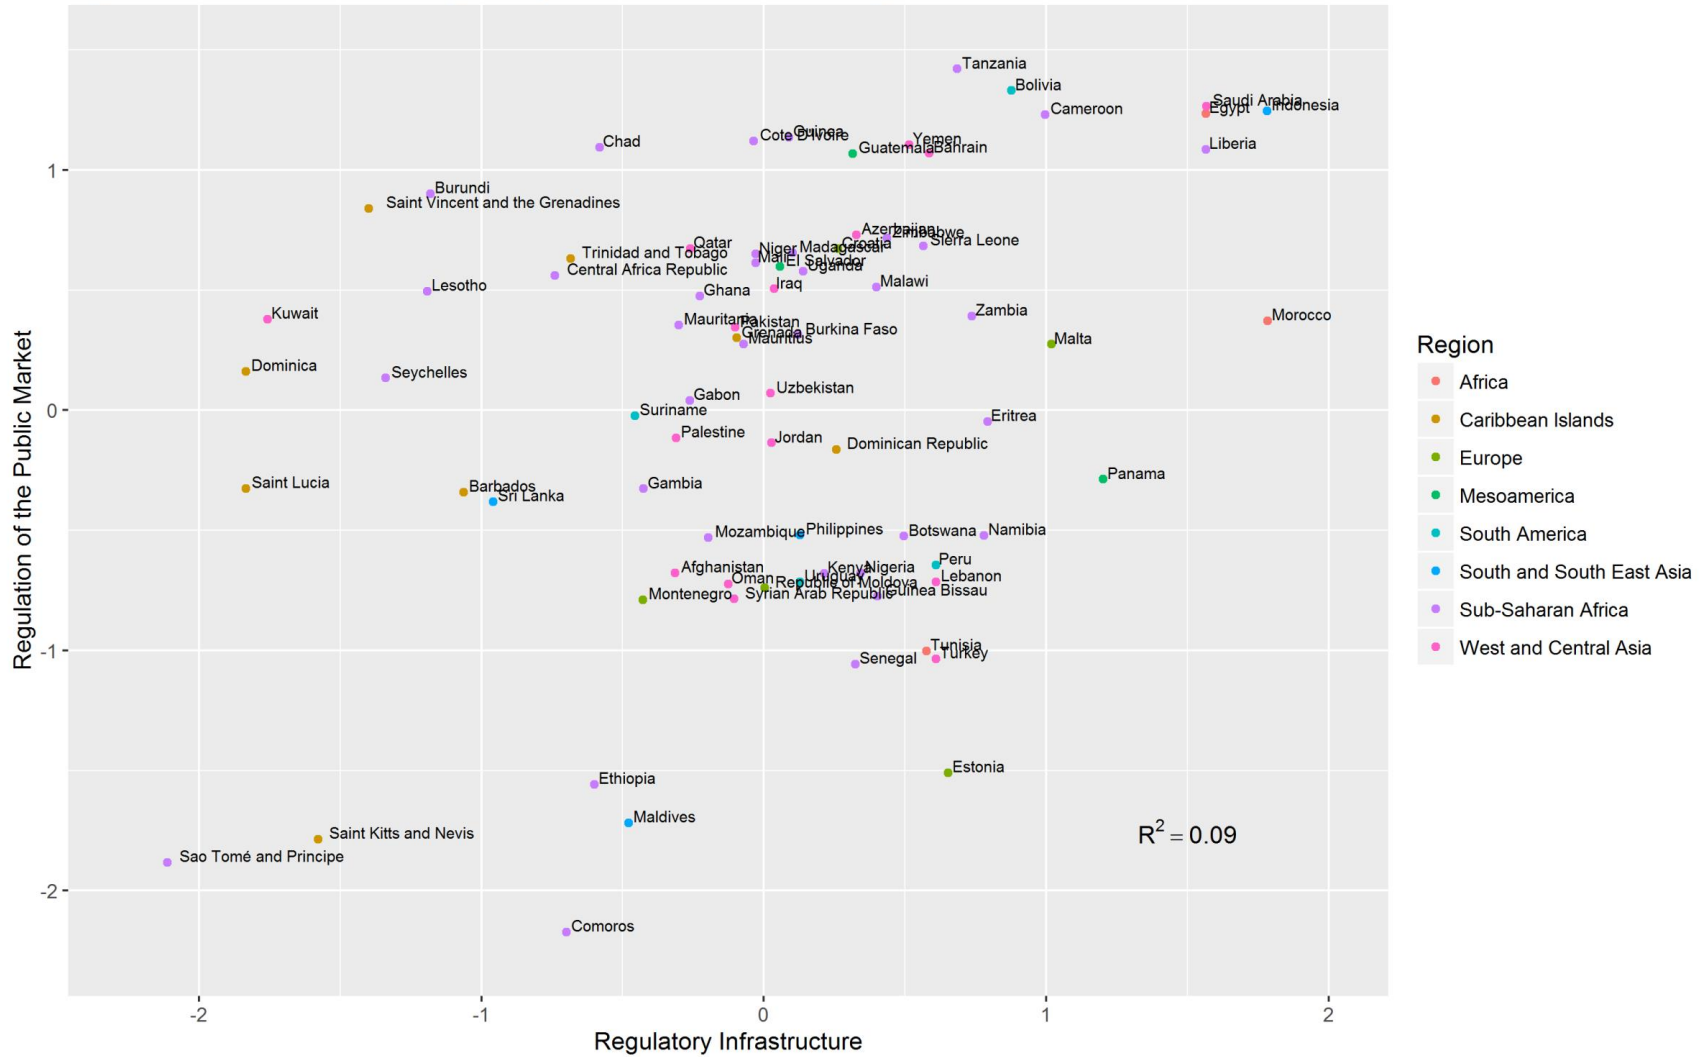



Figure 4. Relation Between Regulation of the Public Market and Regulation of the Private Market

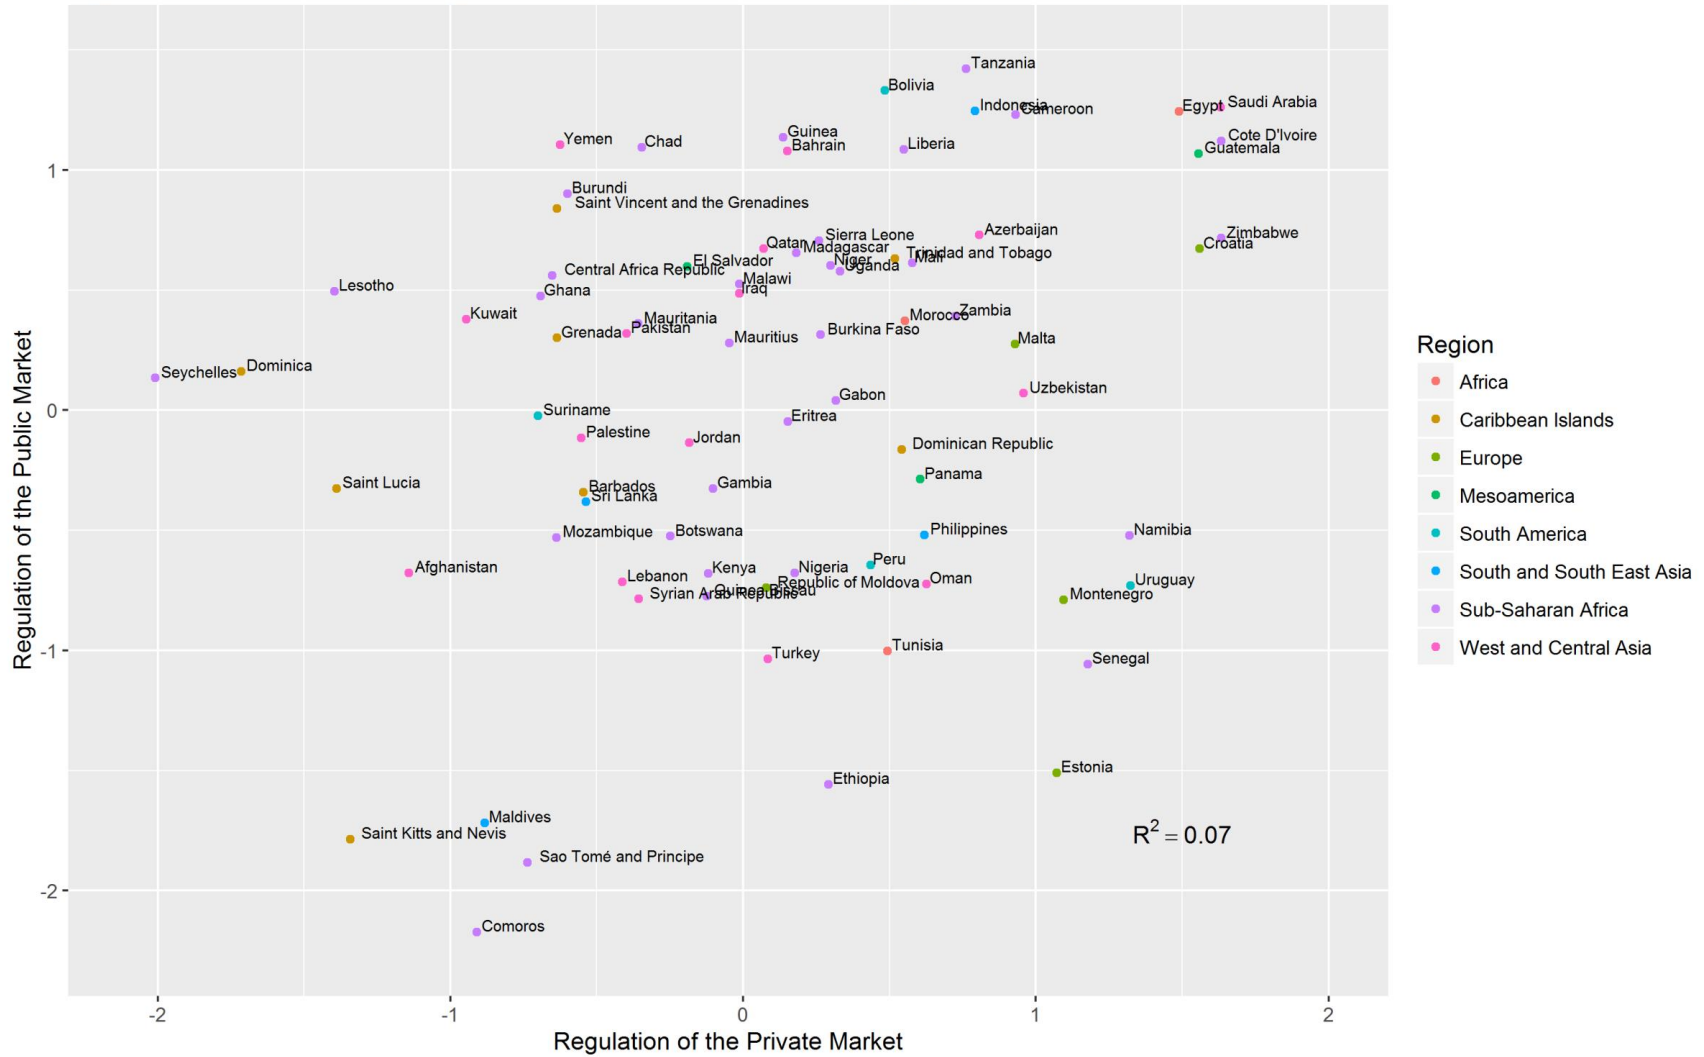

Supplement: 12992_2016_208_MOESM1_ESM.pdf [file 12992_2016_208_MOESM1_ESM.pdf]
